# Supplementary material
Source: PubMed Central journal article supplement (PMC9923720)
Supplement: NIHMS1870897-supplement-Supporting_Information.pdf [file NIHMS1870897-supplement-Supporting_Information.pdf]

# Generation of Proteins with Free N-Terminal Cysteine by Aminopeptidases

Jordan P. Hempfling, Emily R. Sekera, Amar Sarkar, Amanda B. Hummon, and Dehua Pei\*

## Supporting Information

### Table of Contents

|                |     |
|----------------|-----|
| Table S1.....  | S2  |
| Table S2.....  | S2  |
| Table S3.....  | S2  |
| Figure S1..... | S3  |
| Figure S2..... | S4  |
| Figure S3..... | S18 |

**Table S1.** Peptide Sequences Derived from Intensely Colored Beads during Library Screening against *A. sobria* ProAP (Most Preferred Substrates; total 28 sequences)<sup>a</sup>

|                   |                   |                   |                   |      |
|-------------------|-------------------|-------------------|-------------------|------|
| GNRS              | GFKG              | AAGQ              | ALKH              | EFAR |
| GHKF              | GGKU              | AAAR              | ALKN              | FGSV |
| GHYA              | GFSF              | AURU              | AAKF              | RNYN |
| GGKA <sup>b</sup> | AALK              | ASKA <sup>b</sup> | SFKG              | MIHE |
| GGRA              | AHKA <sup>b</sup> | AFKN              | SHKG <sup>b</sup> |      |
| GNFK              | ALAR              | AGVR              | EFTR <sup>b</sup> |      |

<sup>a</sup>Selected from three screening experiments at 100 nM, 300 nM, and 1.0  $\mu$ M *A. sobria* ProAP. U,  $\alpha$ -L-aminobutyric acid; M, norleucine.

<sup>b</sup>Peptides selected for kinetic analysis.

**Table S2.** Peptide Sequences Derived from Medium Colored Beads during Library Screening against *A. sobria* ProAP (Preferred Substrates; total 56 sequences)<sup>a</sup>

|                   |      |      |      |      |
|-------------------|------|------|------|------|
| GAGK              | GRAU | GFHG | AAGK | PARV |
| GYLS              | GHNK | GQUY | UAKS | ERKG |
| GAUR              | GYGI | GAFI | UUKN | EIGR |
| GYAF              | GNKY | GNKG | UASR | RHTR |
| GHFG              | GLKI | GHAG | UMKG | RHFI |
| GFGY              | GGRV | GVYG | SLKM | RTNL |
| GMLY              | GYUN | GALK | SLYP | KPAK |
| GSSK <sup>b</sup> | GFIG | AHKK | SUKG | YEML |
| GAIK              | GGKF | AHKN | SFKN | YRDU |
| GUGR              | GRAL | AUKL | SAKK | FRGK |
| GYSK              | GRGA | AMIK | SNKG | LUFN |
| GMGK              |      |      |      |      |

<sup>a</sup>Selected from three screening experiments performed at 100, 300, and 1000 nM *A. sobria* ProAP. U,  $\alpha$ -L-aminobutyric acid; M, norleucine.

<sup>b</sup>Peptide selected for kinetic analysis.

**Table S3.** Peptide Sequences Derived from Randomly Selected Colorless Beads during Library Screening against *A. sobria* ProAP (Poor Substrates; total 25 sequences)<sup>a</sup>

|      |                   |      |      |      |
|------|-------------------|------|------|------|
| ADDR | EUVD              | HDLA | LQKI | YENI |
| APPE | ELLU              | IDIS | VQNI |      |
| AMVE | HDET <sup>b</sup> | IUAU | VNAK |      |
| UVPN | HIDS              | ITAU | KEUT |      |
| DKPK | HAYV              | ITNF | QUUI |      |
| DFVD | HPQD              | LGSP | TUVV |      |

<sup>a</sup>Selected from the screening experiment with 1000 nM *A. sobria* ProAP. U,  $\alpha$ -L-aminobutyric acid; M, norleucine.

<sup>b</sup>Peptide selected for kinetic analysis.

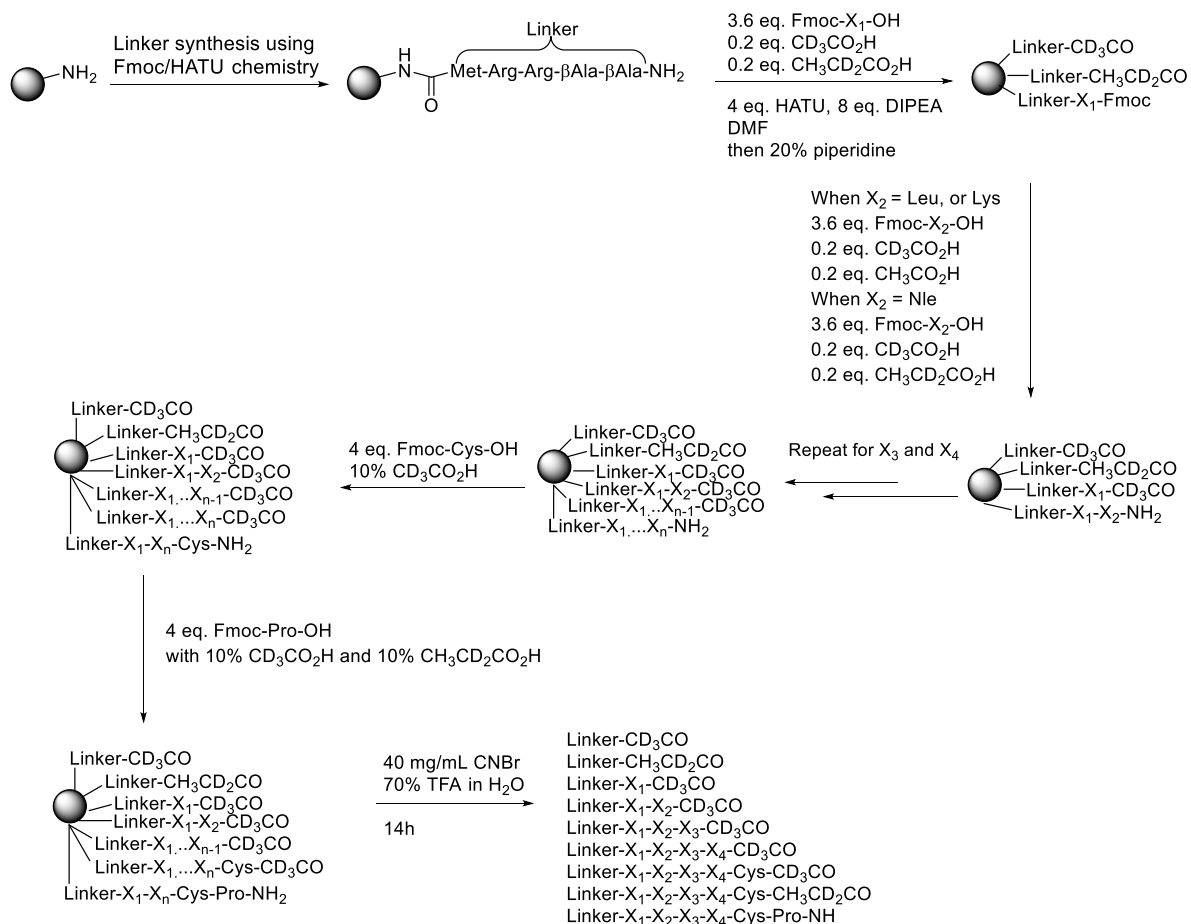

**Figure S1.** Scheme showing the synthesis of resin-bound ProAP substrate peptide library. HATU, (1-[bis(dimethylamino)methylene]-1H-1,2,3-triazolo[4,5-b]pyridinium 3-oxide hexafluorophosphate; DIPEA, diisopropylethylamine.

**Figure S2.** Structures, preparative HPLC chromatograms, UPLC chromatograms, and mass spectra of compounds used in this work. HRMS analysis was performed by MALDI FT-ICR mass spectrometry.

| Compound ID       | Molecular formula<br>[M+H] <sup>+</sup>                                         | Purity (%) | Expected Mass<br>[M+H] <sup>+</sup> | Observed Mass<br>[M+H] <sup>+</sup> |
|-------------------|---------------------------------------------------------------------------------|------------|-------------------------------------|-------------------------------------|
| <b>1</b>          | C <sub>30</sub> H <sub>48</sub> N <sub>9</sub> O <sub>8</sub> S <sup>+</sup>    | 95         | 694.3341                            | 694.3338                            |
| <b>2</b>          | C <sub>31</sub> H <sub>50</sub> N <sub>9</sub> O <sub>10</sub> S <sup>+</sup>   | 96         | 740.3396                            | 740.3391                            |
| <b>3</b>          | C <sub>32</sub> H <sub>52</sub> N <sub>9</sub> O <sub>9</sub> S <sup>+</sup>    | 96         | 738.3603                            | 738.3596                            |
| <b>4</b>          | C <sub>34</sub> H <sub>51</sub> N <sub>11</sub> O <sub>9</sub> S <sup>+</sup>   | 97         | 790.3665                            | 790.3664                            |
| <b>5</b>          | C <sub>41</sub> H <sub>60</sub> N <sub>11</sub> O <sub>11</sub> S <sup>+</sup>  | 100        | 914.4189                            | 914.4194                            |
| <b>6</b>          | C <sub>35</sub> H <sub>54</sub> N <sub>11</sub> O <sub>8</sub> S <sup>+</sup>   | 100        | 788.3872                            | 788.3868                            |
| <b>7</b>          | C <sub>37</sub> H <sub>59</sub> N <sub>12</sub> O <sub>8</sub> S <sup>+</sup>   | 98         | 831.4294                            | 831.4291                            |
| <b>8</b>          | C <sub>36</sub> H <sub>54</sub> N <sub>11</sub> O <sub>8</sub> S <sup>+</sup>   | 98         | 800.3872                            | 800.3882                            |
| <b>9</b>          | C <sub>34</sub> H <sub>52</sub> N <sub>11</sub> O <sub>8</sub> S                | 99         | 774.3716                            | 774.3713                            |
| <b>10</b>         | C <sub>37</sub> H <sub>56</sub> N <sub>11</sub> O <sub>8</sub> S <sup>+</sup>   | 96         | 814.4029                            | 814.4025                            |
| <b>11</b>         | C <sub>36</sub> H <sub>51</sub> N <sub>10</sub> O <sub>13</sub> S <sup>+</sup>  | 98         | 863.3352                            | 863.3351                            |
| <b>Dabcyl-CBT</b> | C <sub>25</sub> H <sub>22</sub> N <sub>7</sub> O <sub>2</sub> S <sup>+</sup>    | -          | 484.1550                            | 484.1547                            |
| <b>CPP12-CBT</b>  | C <sub>84</sub> H <sub>116</sub> N <sub>27</sub> O <sub>15</sub> S <sup>+</sup> | 97         | 1774.8859                           | 1774.8911                           |

## Peptide 1

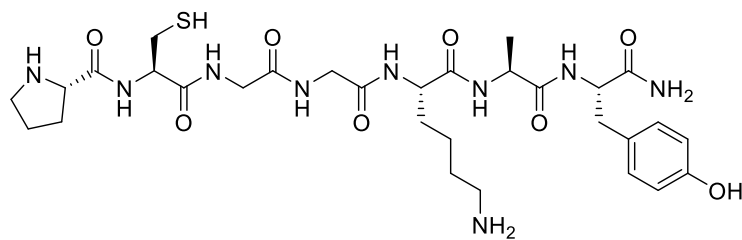

## Semi-preparative HPLC of crude product

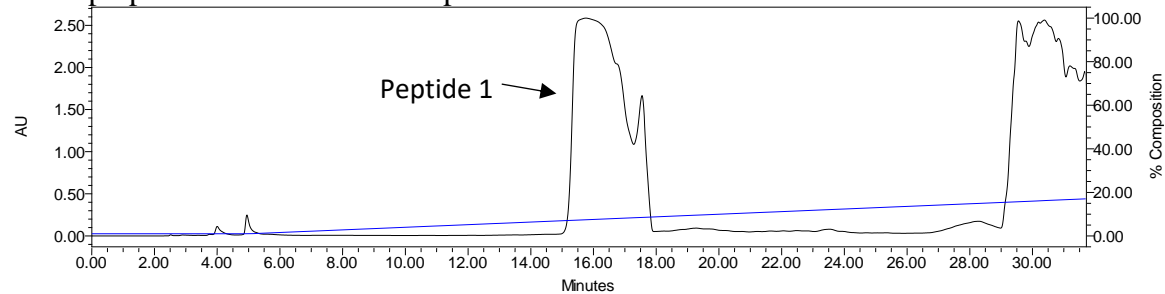

## Purity check by UPLC: 95%

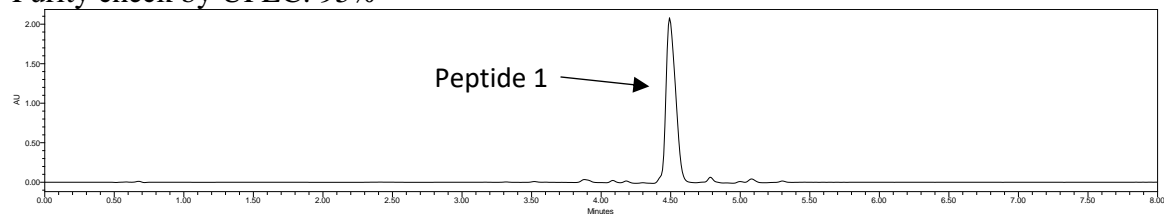

HRMS: Calculated  $[M+H]^+$  694.3341, observed 694.3338

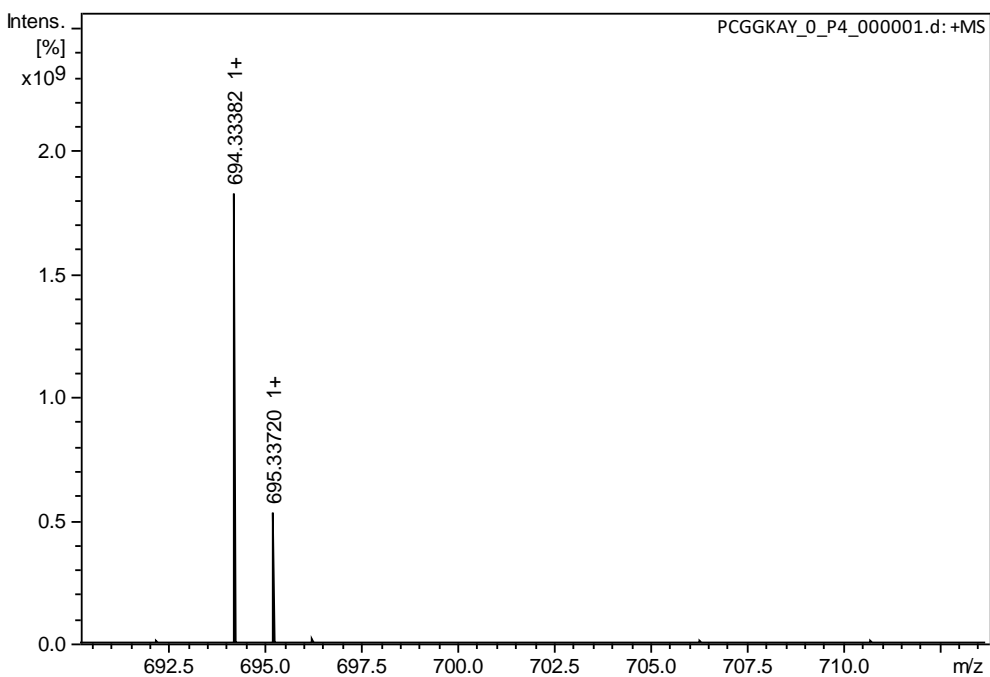

## Peptide 2

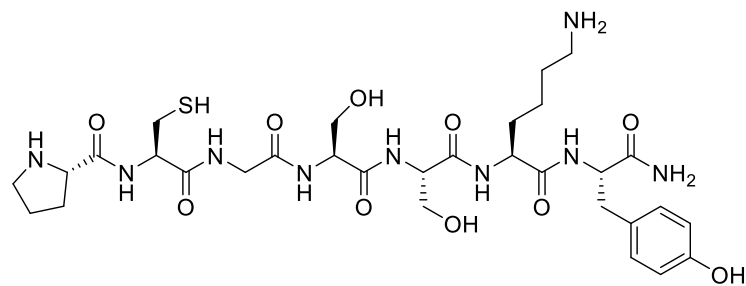

### Semi-preparative HPLC

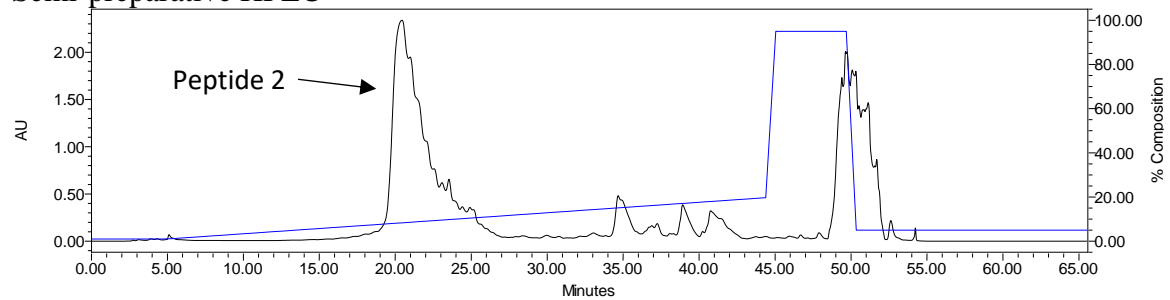

### Purity check (UPLC): 96%

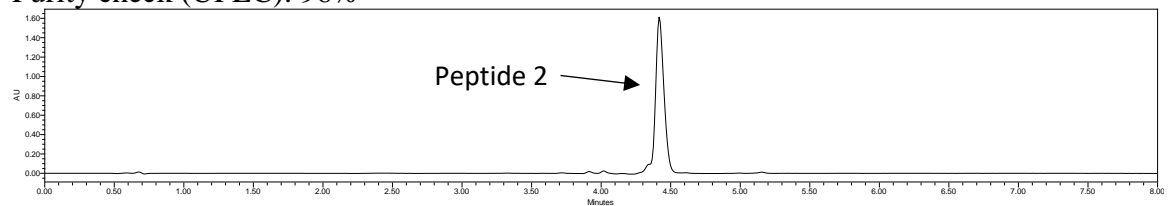

HRMS: Calculated  $[M+H]^+$  740.3396, observed 740.3391

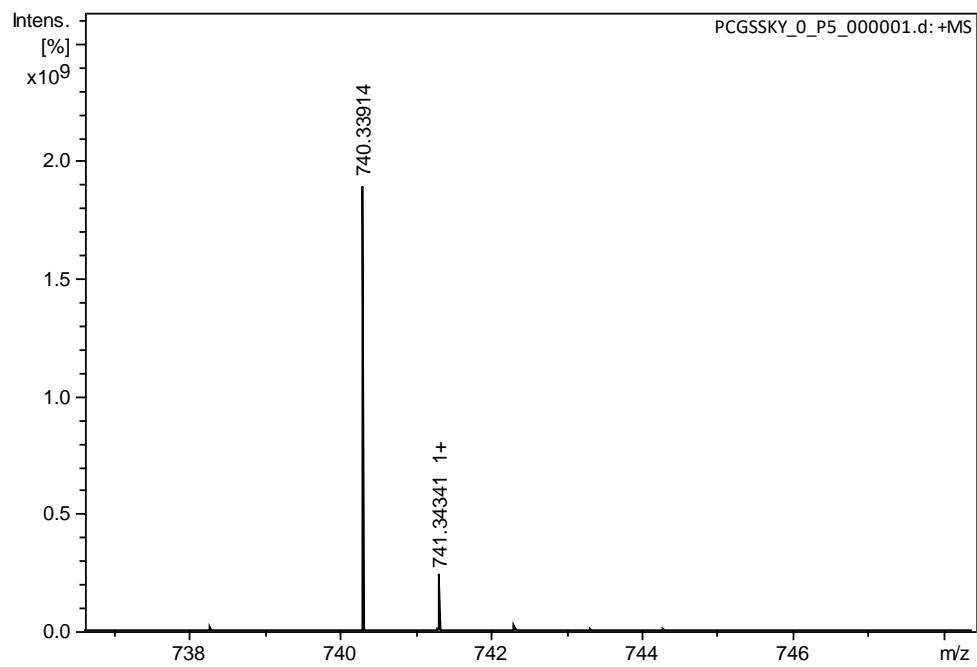

## Peptide 3

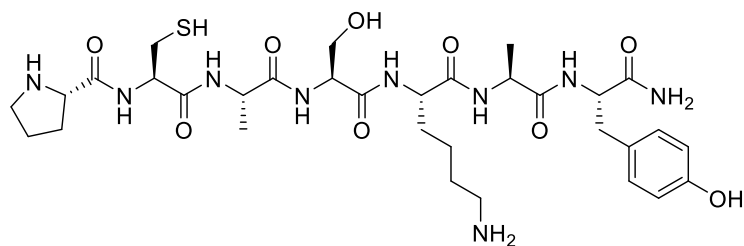

## Semi-preparative HPLC

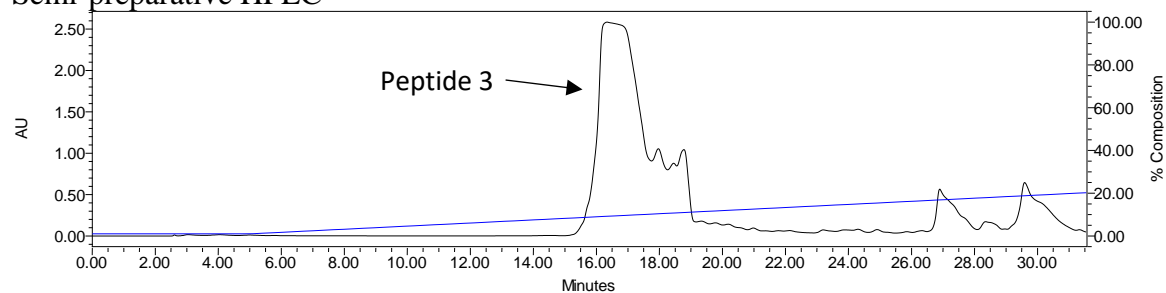

## Purity check (UPLC): 96%

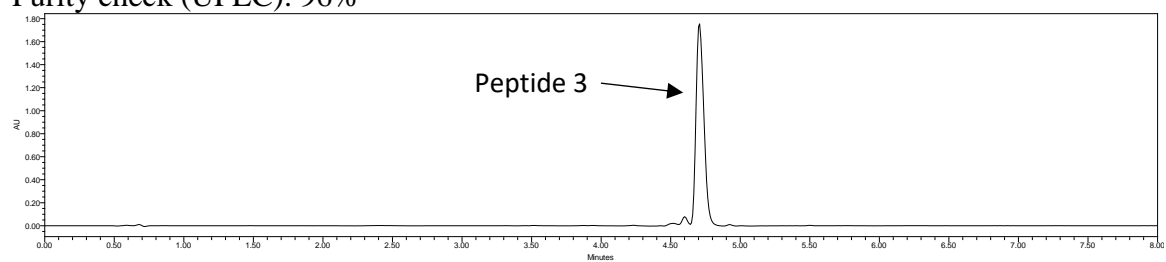

HRMS: Calculated  $[M+H]^+$  738.3603, observed 738.3596

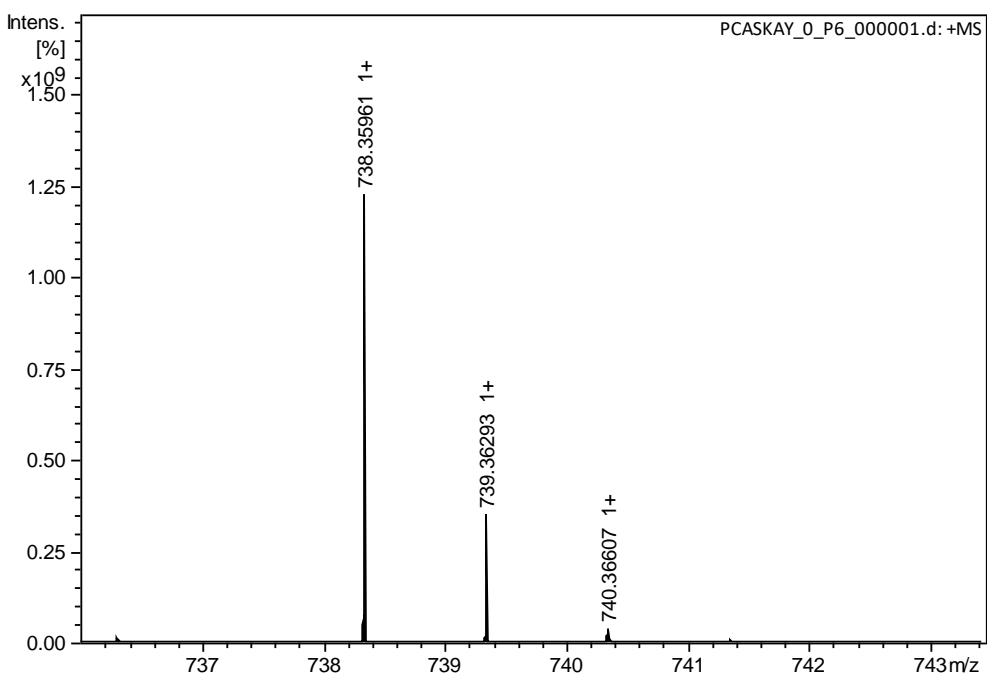

# Peptide 4

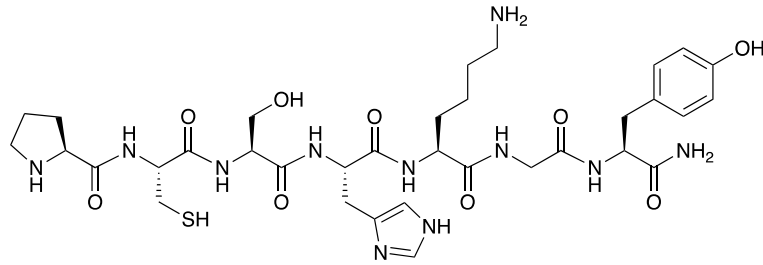

## Semi-preparative HPLC

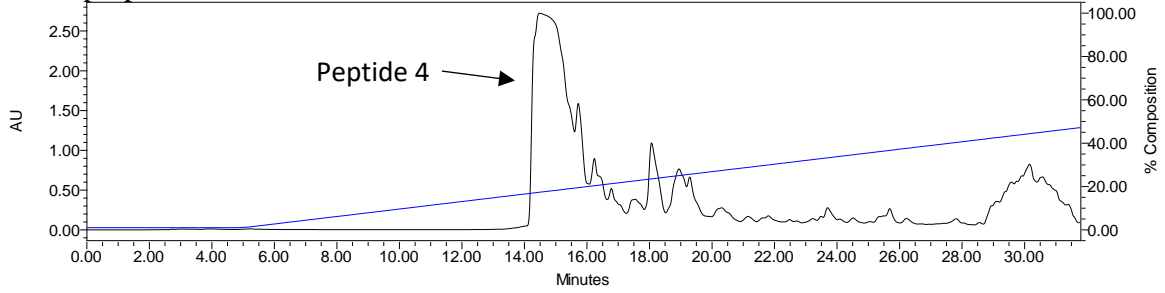

## Purity check (UPLC): 97%

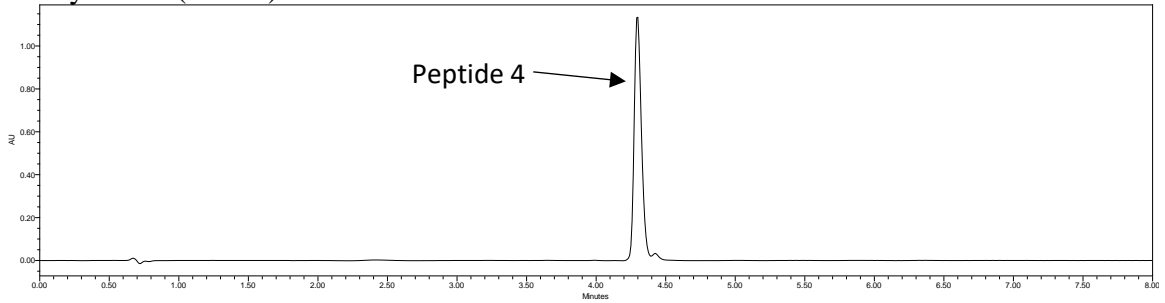

## HRMS: Calculated $[M+H]^+$ 790.3665, observed 790.3664

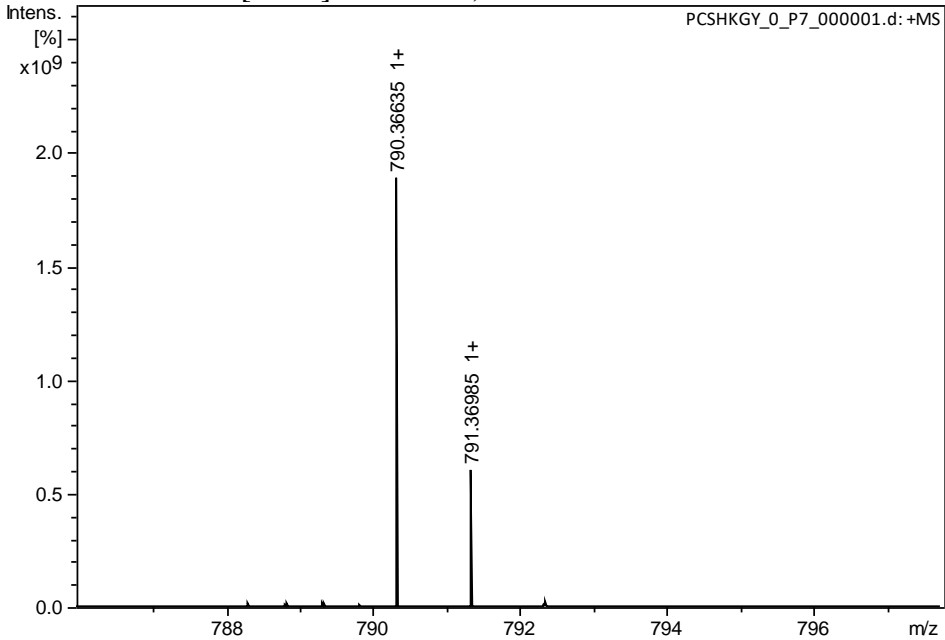



## Peptide 5

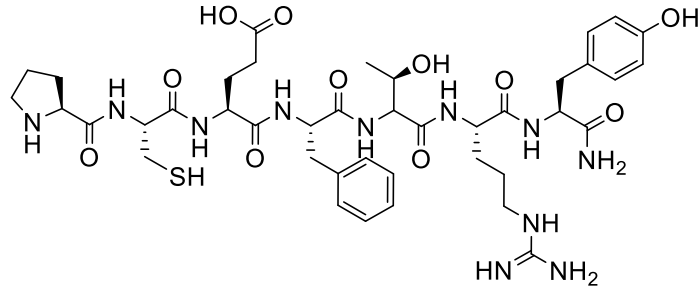

## Semi-preparative HPLC

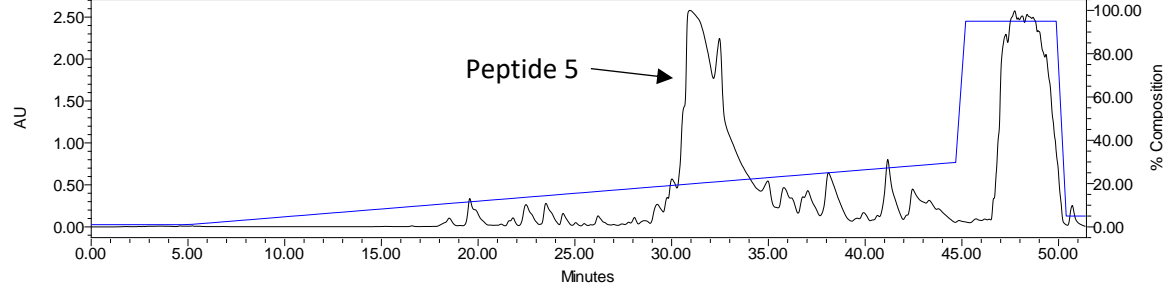

## Purity check (UPLC): 100%

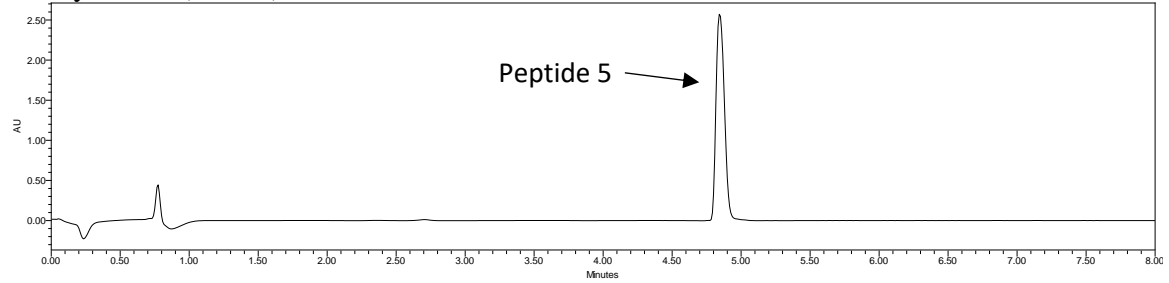

## HRMS: Calculated $[M+H]^+$ 914.4189, observed 914.4194

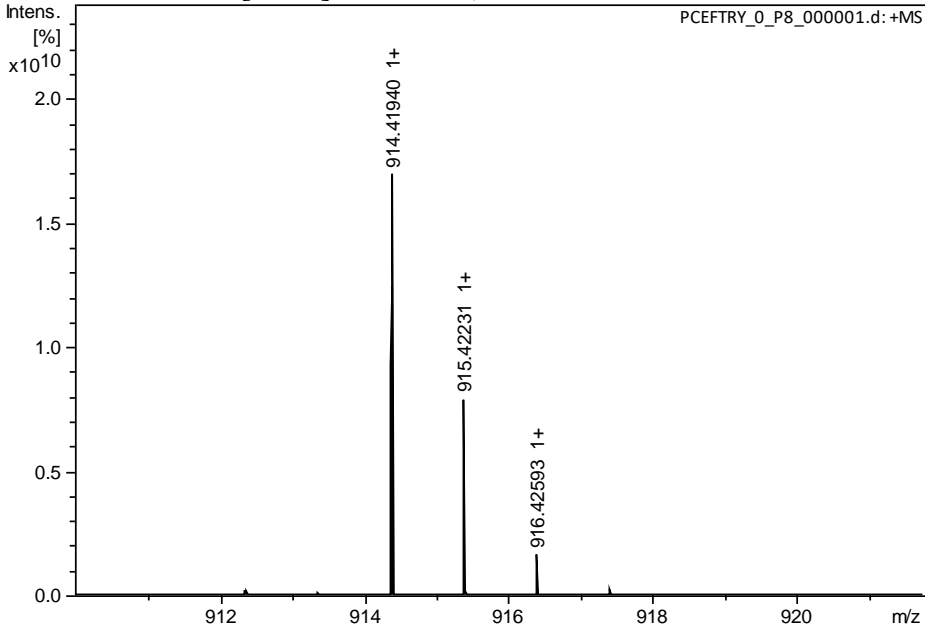

## Peptide 6

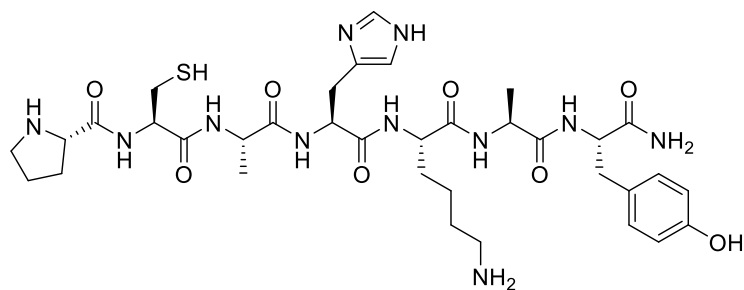

## Semi-preparative HPLC

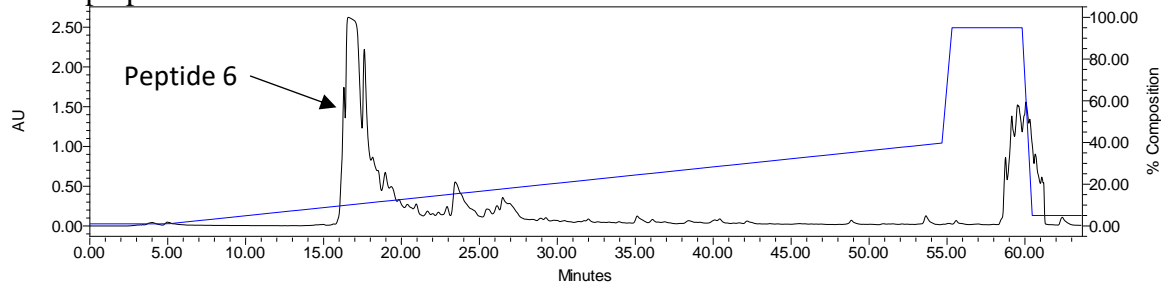

## Purity check (UPLC): 100%

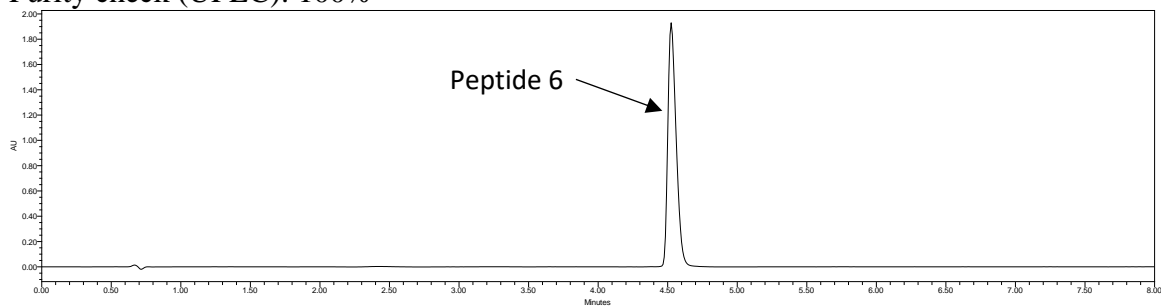

## HRMS: Calculated $[M+H]^+$ 788.3872, observed 788.3868

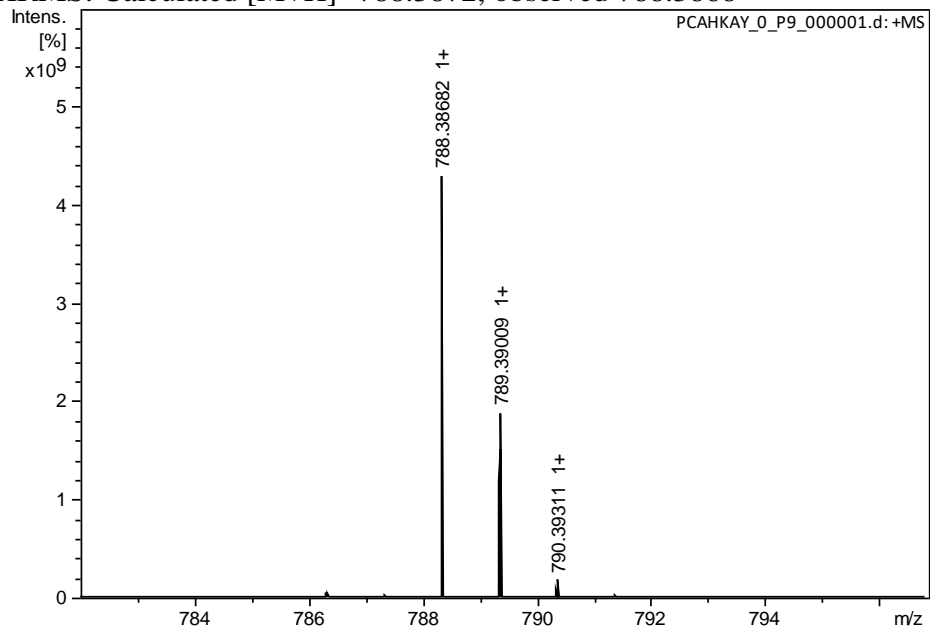

# Peptide 7

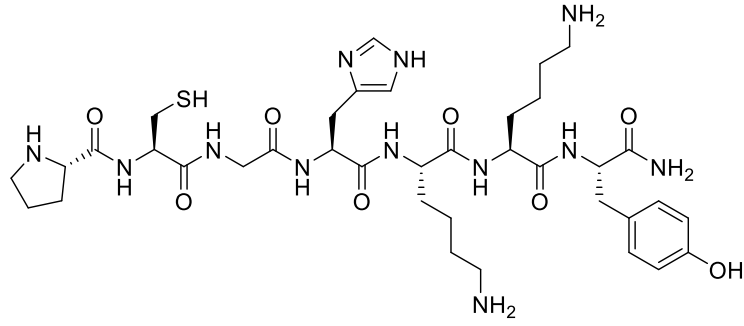

## Semi-preparative HPLC

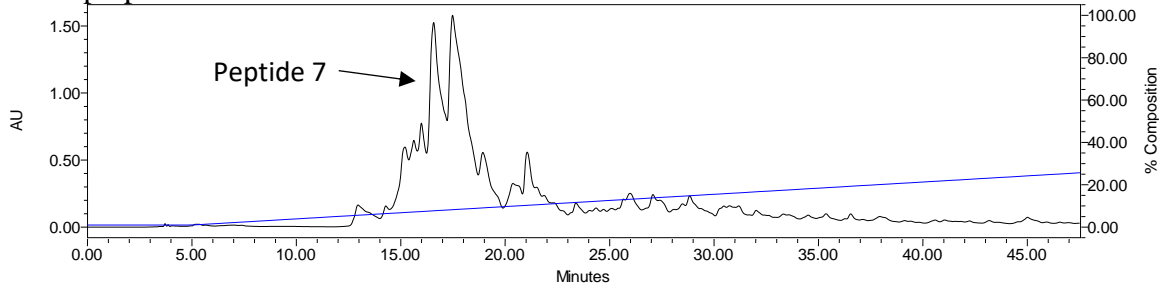

## Purity check (UPLC): 98%

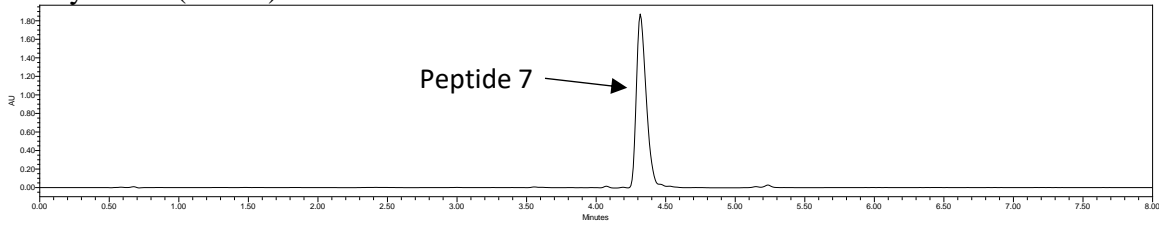

## HRMS: Calculated $[M+H]^+$ 831.4294, observed 831.4291

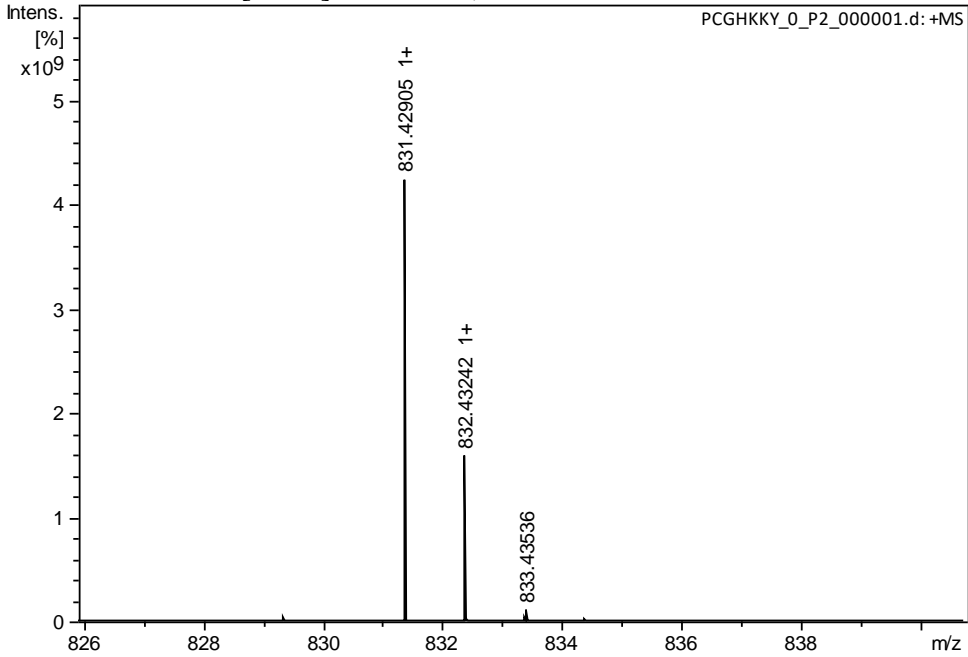



## Peptide 9

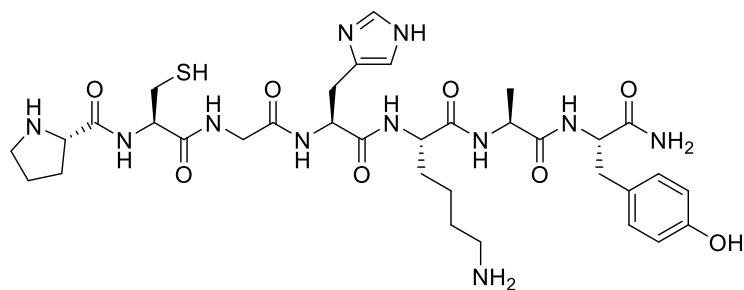

### Semi-preparative HPLC

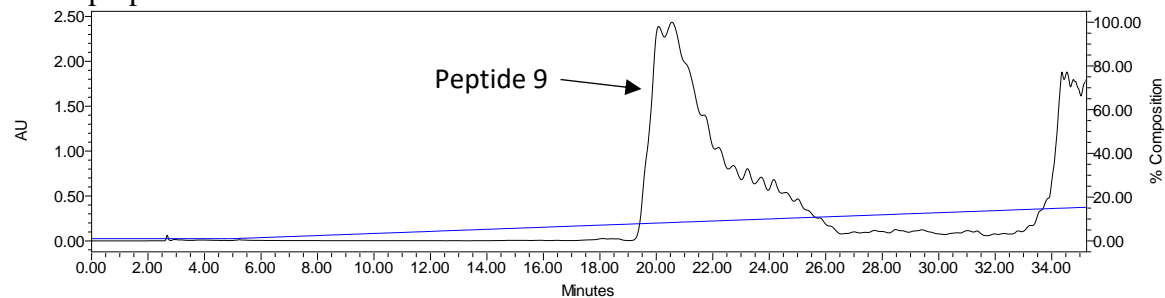

### Purity check (UPLC): 99%

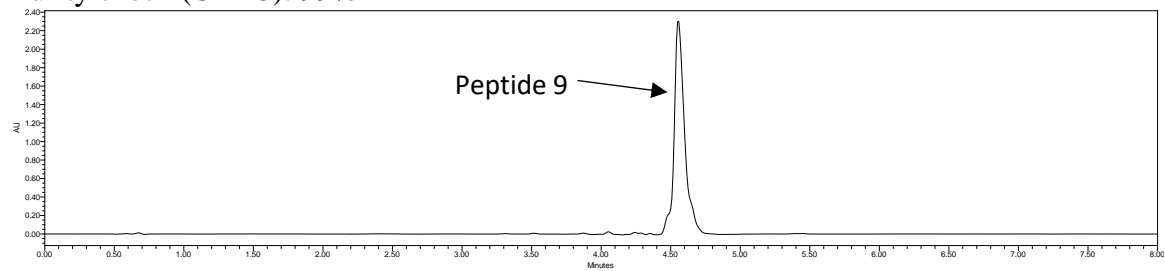

### HRMS: Calculated $[M+H]^+$ 774.3716, observed 774.3713

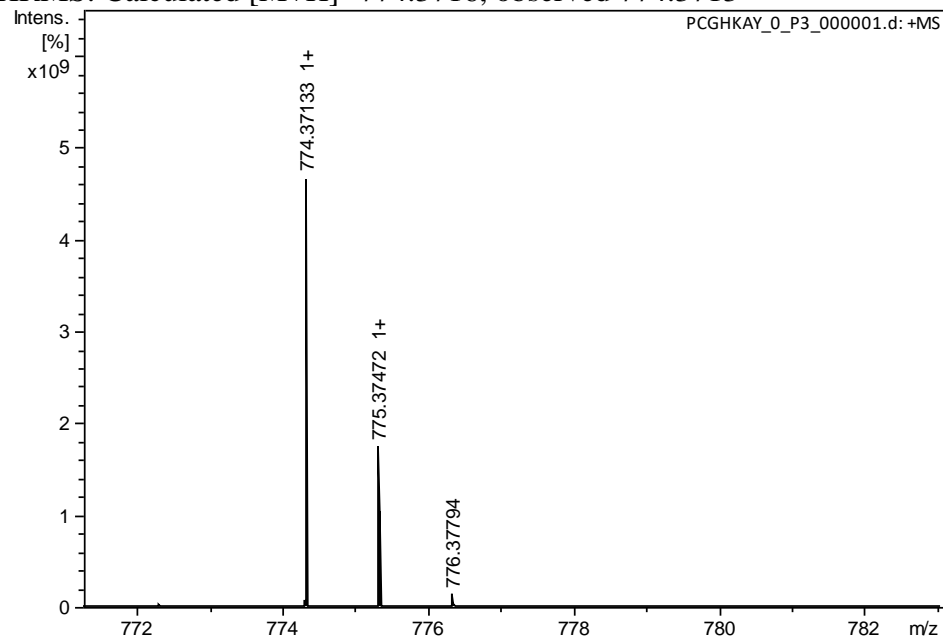

# Peptide 10

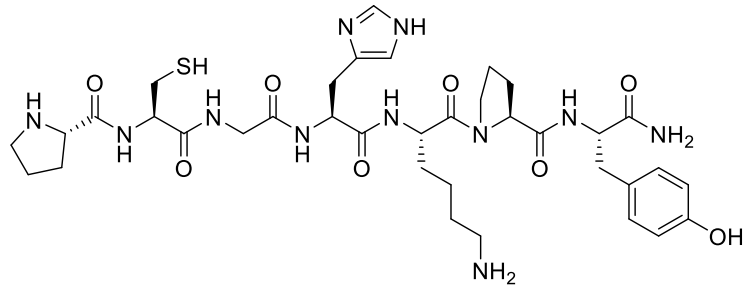

## Semi-preparative HPLC

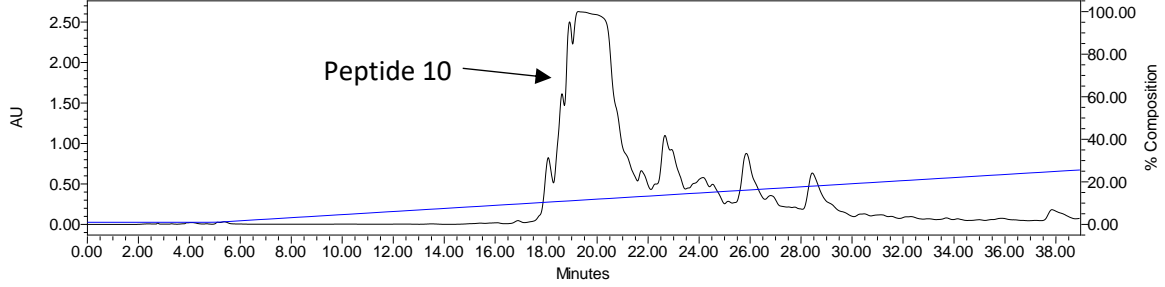

## Purity check (UPLC): 96%

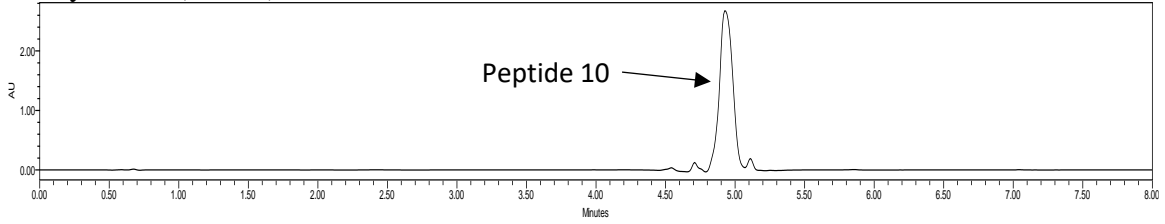

## HRMS: Calculated $[M+H]^+$ 814.4029, observed 814.4025

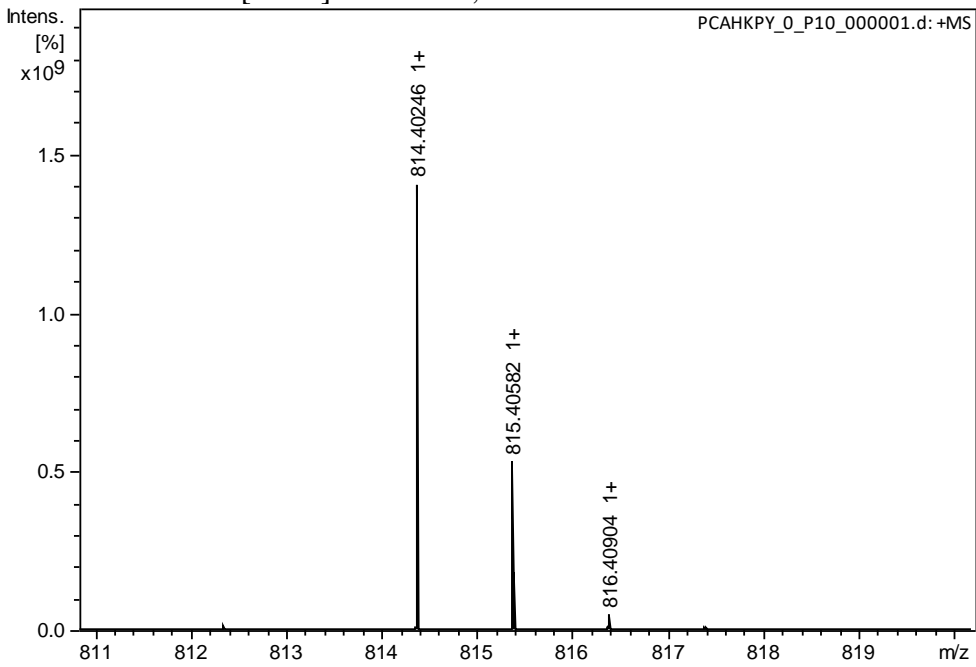

## Peptide 11

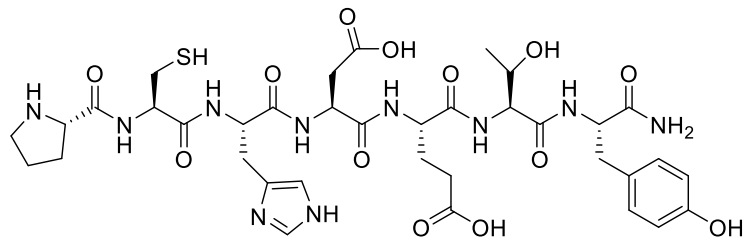

### Semi-preparative HPLC

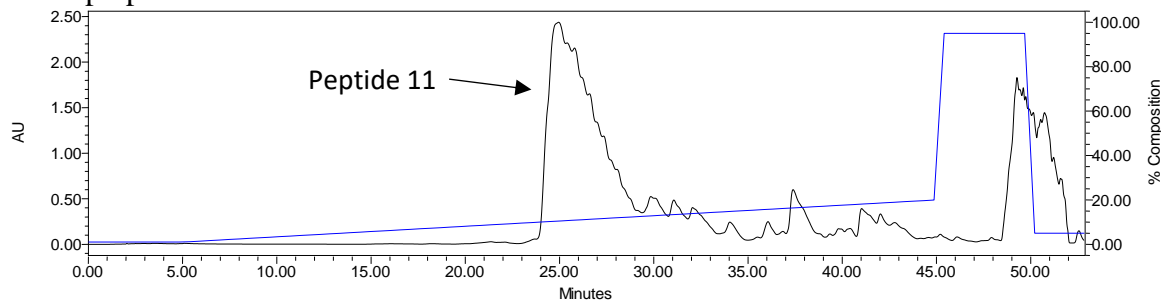

### Purity check (UPLC): 98%

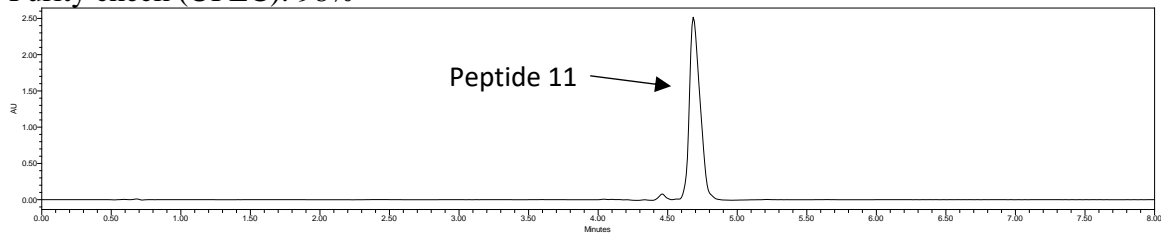

### HRMS: Calculated $[M+H]^+$ 863.3352, observed 863.3351

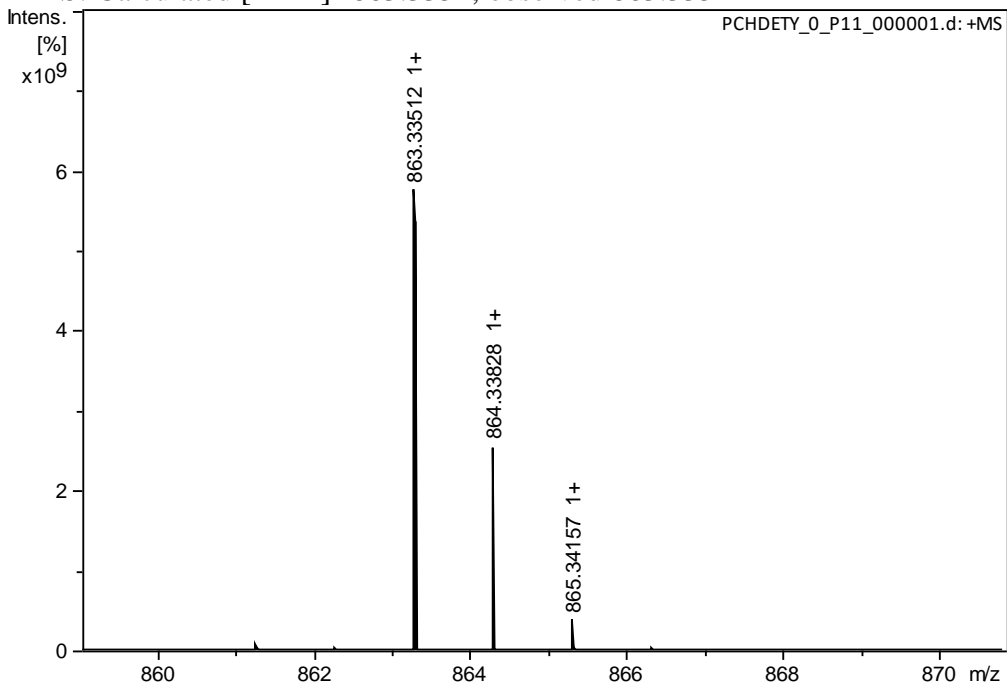





## Dabcyl-CBT

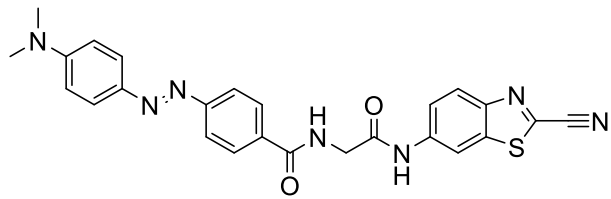

HRMS: Calculated  $[M+H]^+$  484.1550, observed 484.1547

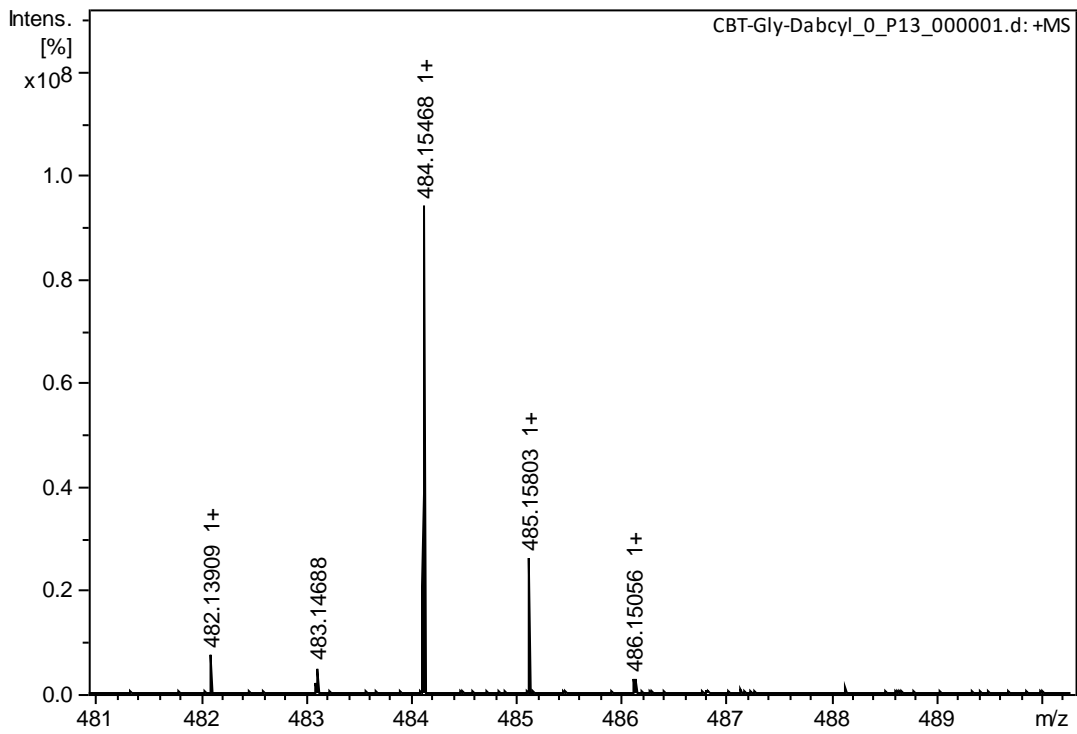

**Figure S3.** Plasmids used for bacterial expression of ProAP and RBDV in this work. *(a)* Restriction map of plasmid pET-15b(+)-His<sub>6</sub>-ProAP. The plasmids for RBDV expression have a similar restriction map. *(b)* Amino acid sequences for *A. sobria* ProAP and RBDV proteins.

*a*

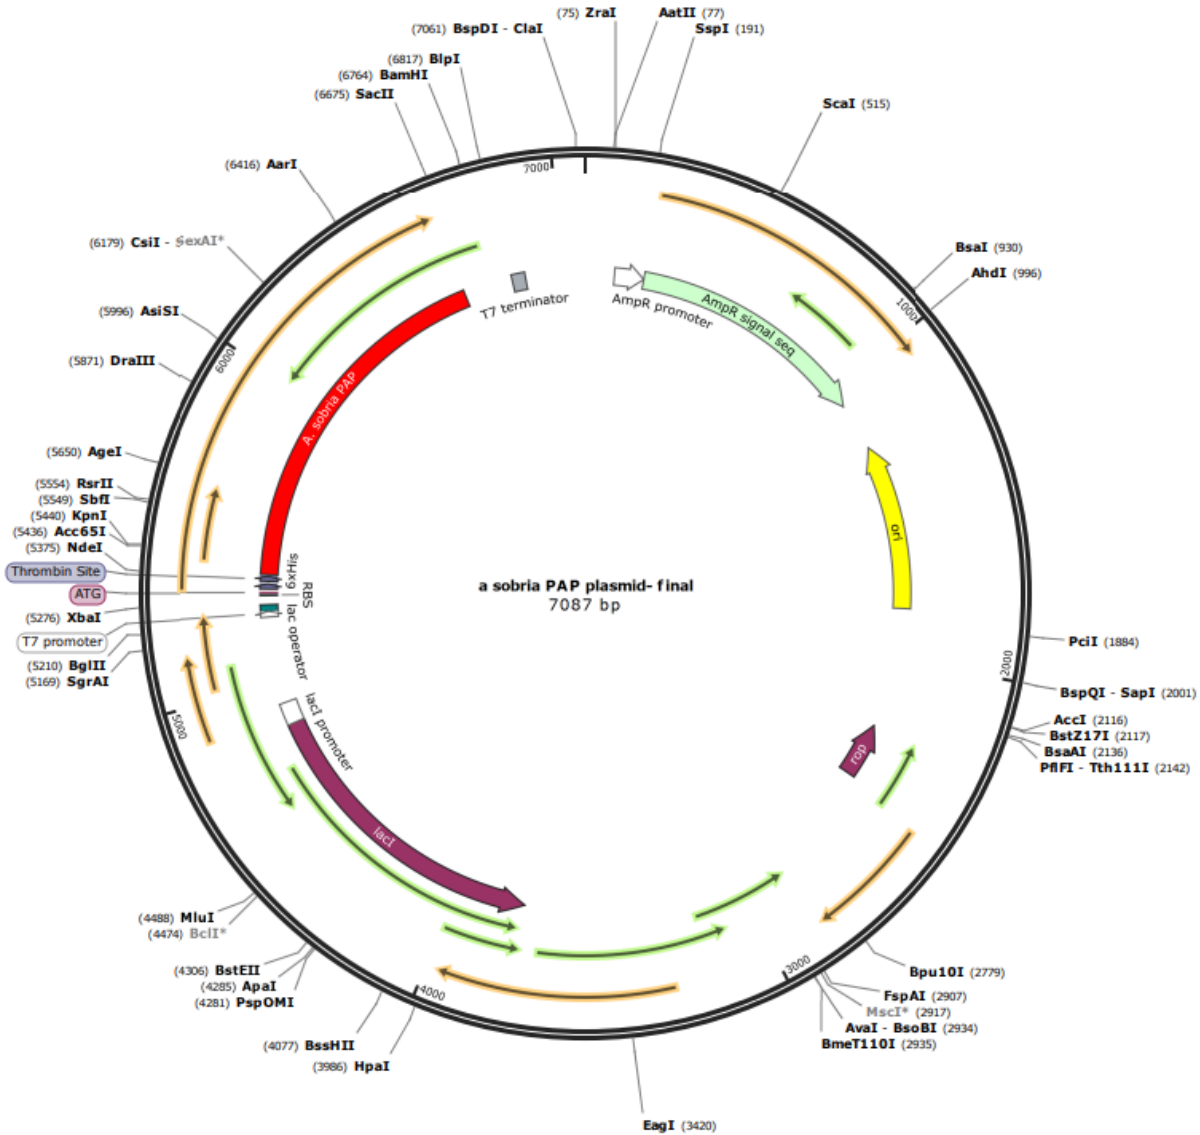

***b***

*A. sobria* ProAP:

MGSSHHHHHSSGLVPRGSHMSSPLHYVLDGIHCEPHFFTVPDLHQQPDEETITLFGRT  
LCRKDRLDDELPWLLYLQGGPGFGAPRPSANGGWIKRALQEFRVLLLDQRGTGHSTPIH  
AELLAHLNPRQQADYLSHFRAADSIVRDAELIREQLSPDHPWSLLGQSFGGFCSLTYLSLF  
PDSLHEVYLTGGVAPIGRSADEVYRATYQRVADKNRAFFARFPHAQAIANRLATHLQR  
HDVRLPNGQRLTVEQLQQQGLDLGASGAFEELYLLEDAFIGEKLNPAFLYQVQAMQP  
FNTNPVFAILHELIYCEGAASHWAAERVRGEFPALAWAQGKDFAFMGEMIFPWFQF  
RELIPLKEAAHLLAEKADWGPLYDPVQLARNKVPVACAVYAEDMYVEFDYSRETLKGL  
SNSRAWITNEYEHNGLRVDGEQILDRLIRLNRDC\*

MPC-RBDV:

MPCKTSNTIRVLLPNQEWTVVKVRNGMSLHDSLMKALKRHGLQPESAVFRLLEHKG  
KKARLDWNTDAASLIGEELQVDFLDHVPLTTHNFARKTFLKLGHRDGSSGSSLEHHHH  
HH\*

MPCGHKP-RBDV:

MPCGHKPKTSNTIRVLLPNQEWTVVKVRNGMSLHDSLMKALKRHGLQPESAVFRLLEH  
EHKGGKKARLDWNTDAASLIGEELQVDFLDHVPLTTHNFARKTFLKLGHRDGSSGSSLE  
HHHHHH\*

MPCGHKP-(GSS)<sub>2</sub>-RBDV:

MPCGHKPGSSGSSKTSNTIRVLLPNQEWTVVKVRNGMSLHDSLMKALKRHGLQPESAV  
VFRLLEHKGKKARLDWNTDAASLIGEELQVDFLDHVPLTTHNFARKTFLKLGHRDGS  
SGSSLEHHHHHH\*
